# Supplementary material for: Myosin VI regulates the spatial organisation of mammalian transcription initiation
Source: PubMed Central journal article supplement (PMC8924246; doi:10.1038/s41467-022-28962-w), 2022-03-15
Supplement: 41467_2022_28962_MOESM1_ESM.pdf [file 41467_2022_28962_MOESM1_ESM.pdf]

## **SUPPLEMENTARY INFORMATION**

**Myosin VI regulates the spatial organization of mammalian transcription initiation.**

**Yukti Hari-Gupta, Natalia Fili, Ália dos Santos, Alexander W. Cook, Rosemarie E. Gough, Hannah C. W. Reed, Lin Wang, Jesse Aaron, Tomas Venit, Eric Wait, Andreas Grosse-Berkenbusch, J. Christof M. Gebhardt, Piergiorgio Percipalle, Teng-Leong Chew, Marisa Martin-Fernandez and Christopher P. Toseland**

**A**

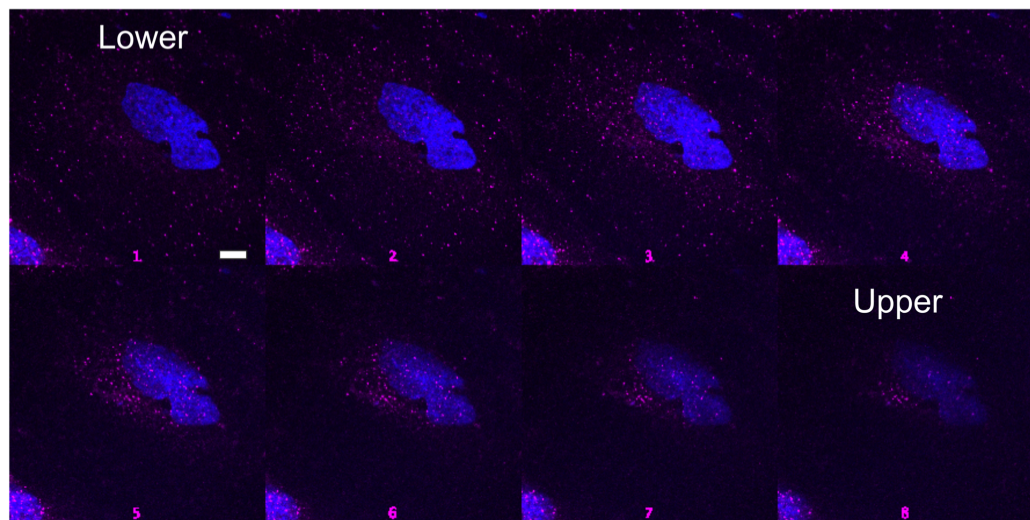

**B**

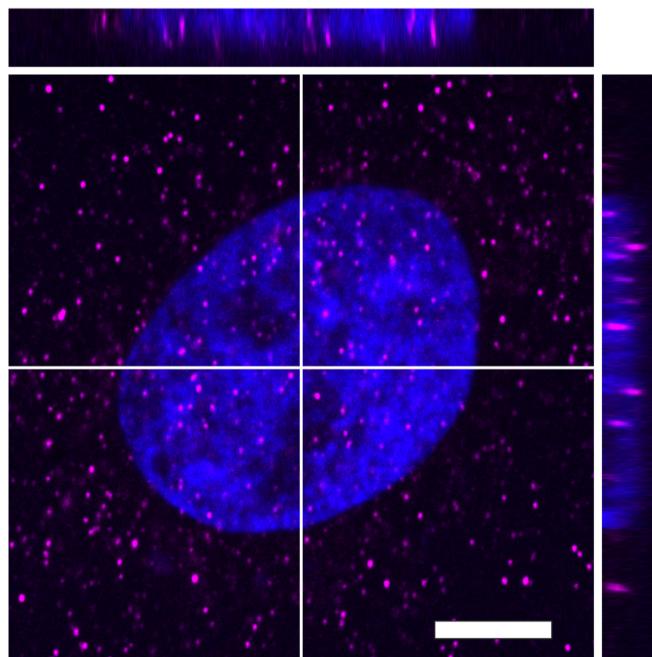

**Supplementary Fig. 1 Nuclear localisation of MVI.** (A) Immunofluorescence staining against MVI (magenta) and DNA (cyan) in HeLa cells. Images were acquired at 400 nm intervals in the z axis through the nuclear body. (scale bar 5  $\mu\text{m}$ ). (B) A cross-section is presented depicting MVI in the nucleus. (scale bar 5  $\mu\text{m}$ ).

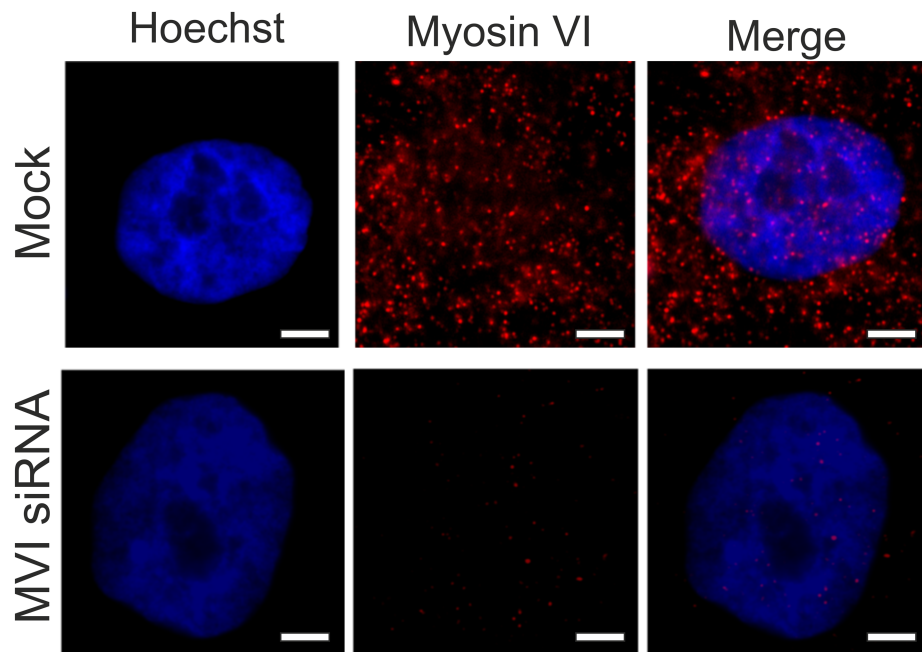

**Supplementary Fig. 2 Representative images of myosin VI following siRNA knockdown.** Widefield Immunofluorescence staining against myosin VI (MVI) (magenta) and DNA (cyan) in HeLa cells under mock (control siRNA treatment) and siRNA conditions following 48 hr transfection. Images were acquired at the mid-point of the nucleus (scale bar 5  $\mu\text{m}$ ).

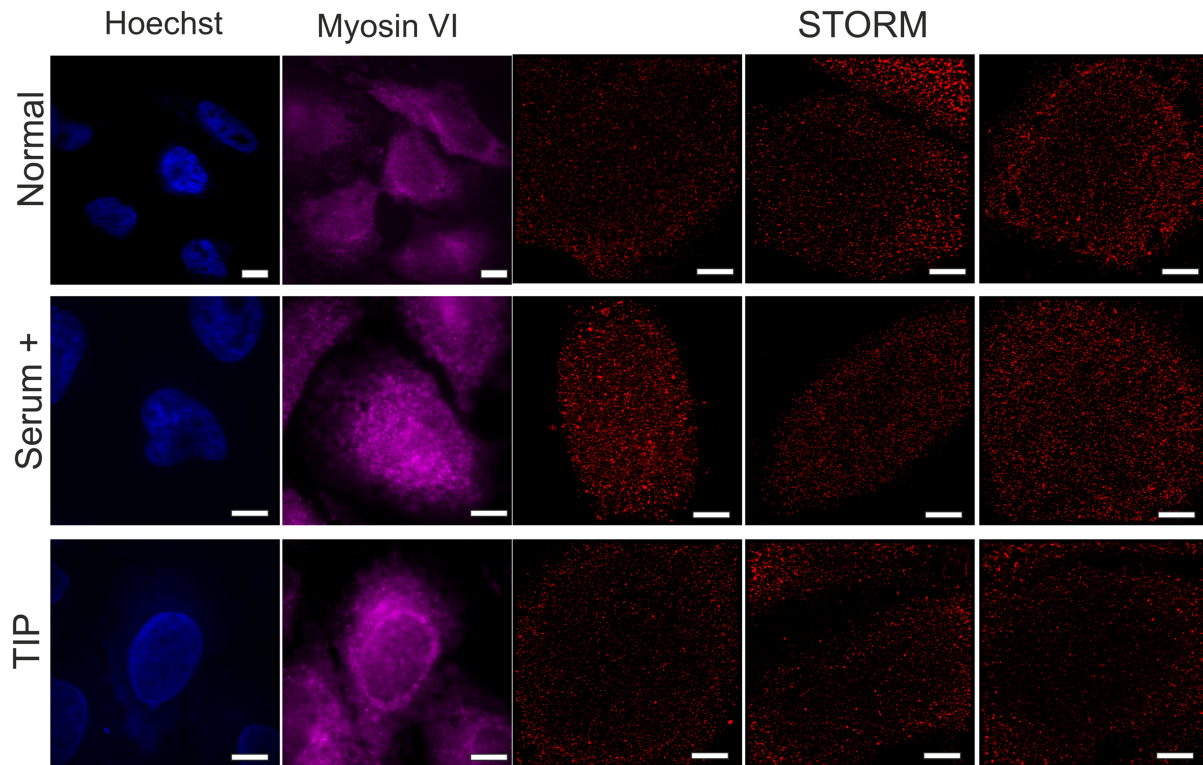

**Supplementary Fig. 3 Further examples of MVI nuclear organisation.** (Left) Example confocal images following immunofluorescence staining against MVI (magenta) and DNA (cyan) in HeLa cells under normal, serum stimulated and TIP-treated conditions (Scale bar 5  $\mu\text{m}$ ). (Right) Example STORM render images of MVI under normal, serum and TIP-treated conditions, as described in the Methods (scale bar 2  $\mu\text{m}$ ). Z-stack of Normal condition is shown in Supplementary Movie 1 and serum treated condition is shown in Supplementary Movie 4.

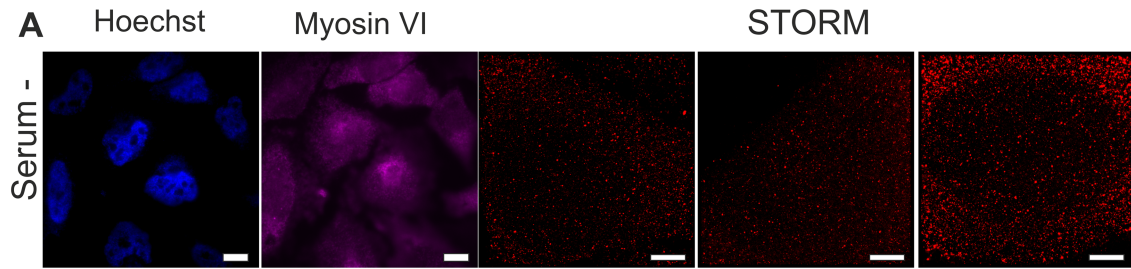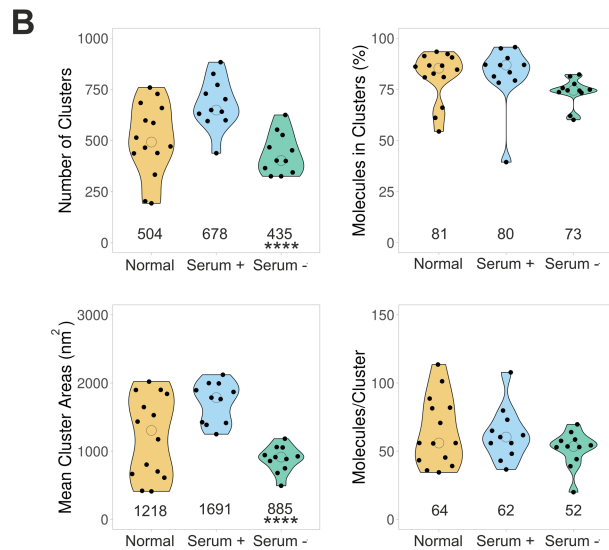

**Supplementary Fig. 4 MVI nuclear organisation following serum-starvation.** (A) Example confocal (Scale bar 10 $\mu$ m) and STORM render (Scale bar 2 $\mu$ m) of MVI following immunofluorescence staining. Z-stack is shown in Supplementary Movie 5. (B) Cluster analysis of MVI nuclear organisation under normal, serum-treated and serum-starved conditions. Individual data points correspond to the average value for a cell ROI (n = 14 for normal, 11 for serum-treated and 11 for serum-starved). The values represent the mean from the ROIs for each condition (Only statistically significant changes are highlighted \*p < 0.05, \*\*p < 0.01 by two-tailed t-test comparing serum-stimulated to starved conditions).

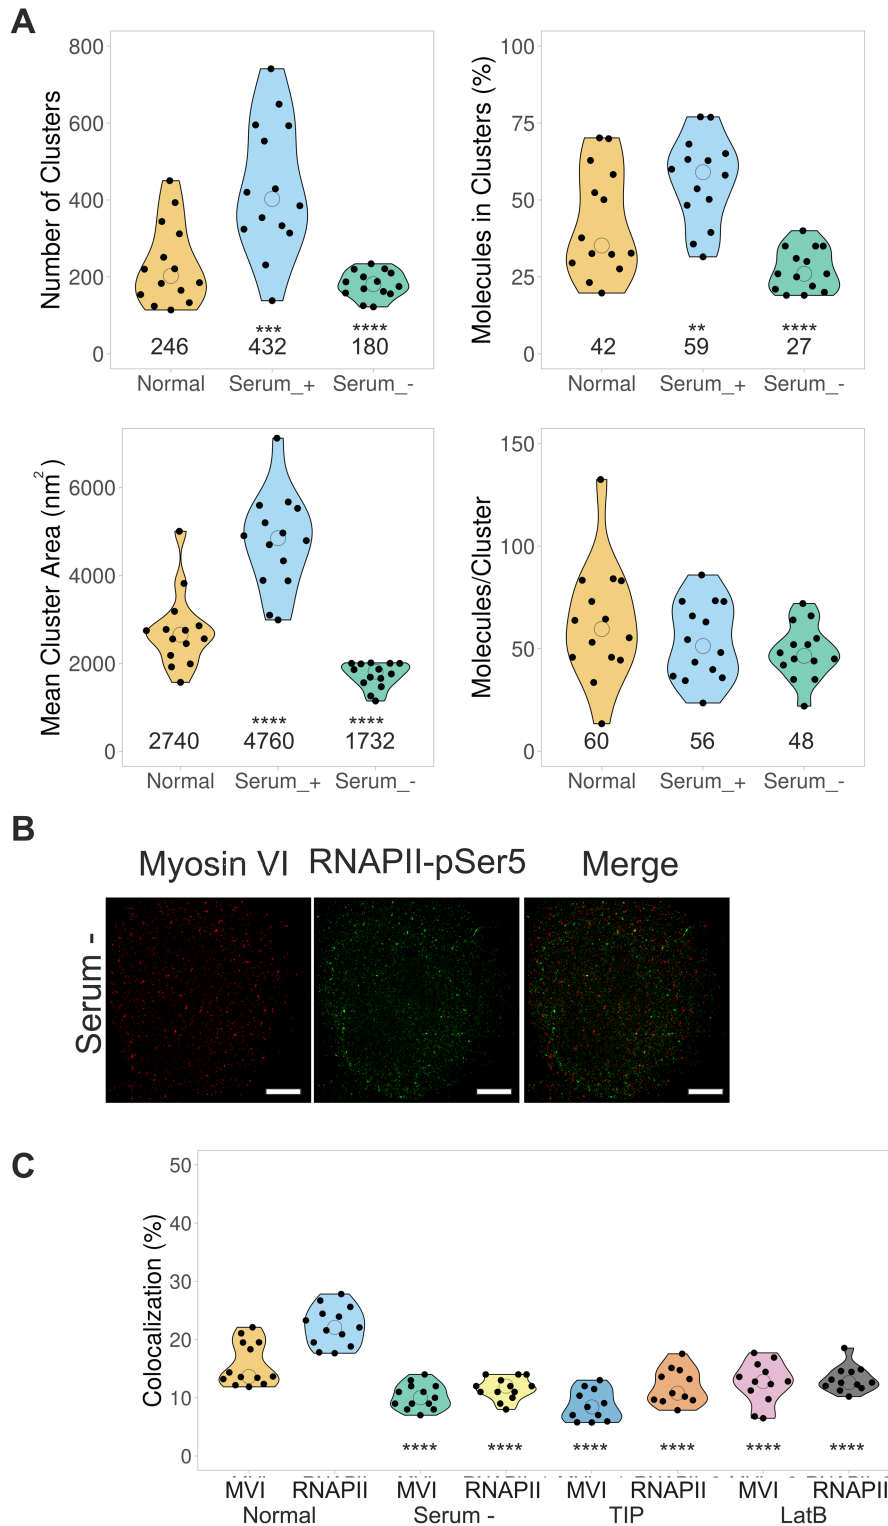

**Supplementary Fig. 5 Cluster analysis and colocalization of MVI and RNAPII-pSer5.** (A) Cluster analysis of RNAPII nuclear organisation under normal, serum-treated and starved conditions. Individual data points correspond to the average value for a cell ROI (n=14). The values represent the mean from the ROIs for each condition. (Only statistically significant changes are highlighted \*\*p < 0.01, \*\*\*p < 0.001, \*\*\*\*p < 0.0001 by two-tailed t-test compared to normal conditions). (B) Example STORM render image of MVI and RNAPII-pSer5 under serum-starvation conditions (scale bar 2  $\mu$ m). (C) Colocalization analysis of myosin VI (MVI) and RNAPII-pSer5 clusters under normal (n=13), serum-starvation (n=13), TIP- (n=11) and

LatB-treated (n=11) conditions. Individual data points represent the percentage of each protein which is colocalized based on a DoC value above 0.4. (Only statistically significant changes are highlighted \*\*\*\*p <0.0001 by two-tailed t-test compared to normal conditions for each protein).

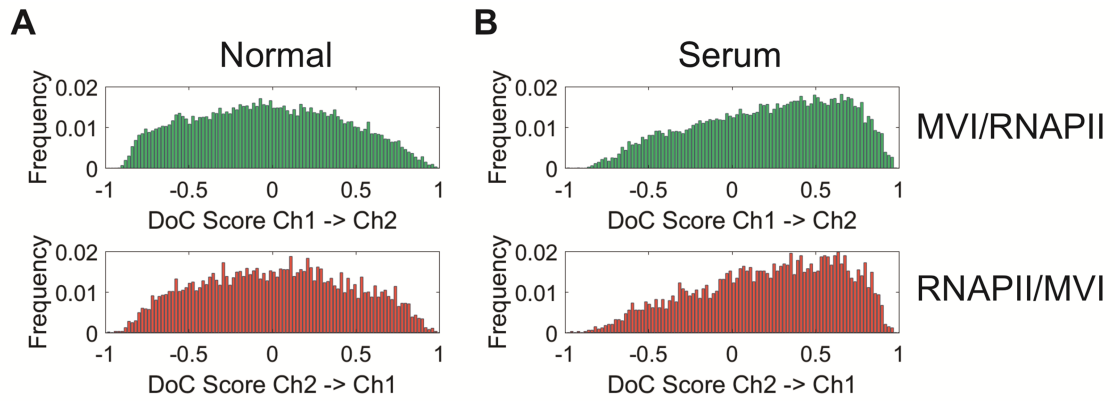

**Supplementary Fig. 6 Colocalisation of MVI and RNAPII.** Representative DoC value histograms for MVI colocalised with RNAPII and RNAPII colocalised with MVI under normal (A) and Serum stimulated conditions (B). The DoC values are calculated using coordinate-based colocalization analysis (26) in Clus-DoC (21). -1 is segregated, 0 is random distribution and +1 is colocalised. A threshold is applied at values about +0.4 to determine colocalised molecules, as described in (21).



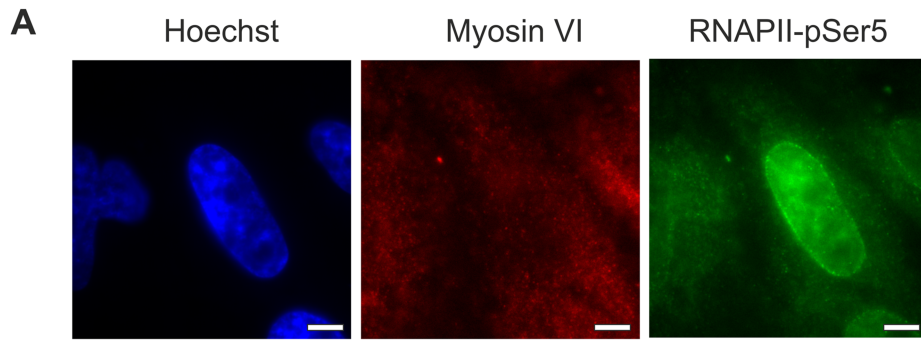

**B** Myosin VI and RNAPII-pSer5 TIP Widefield

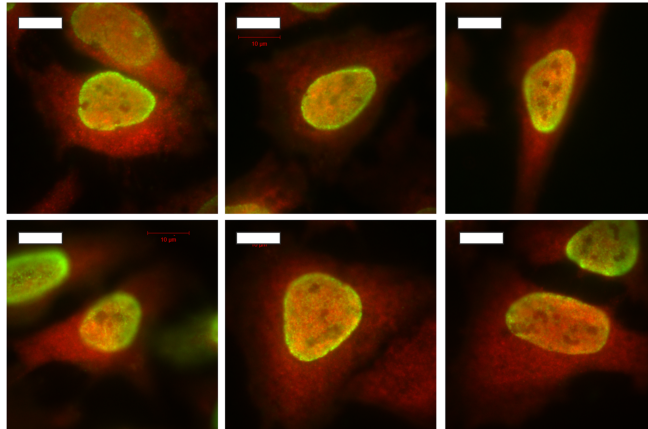

**C** Myosin VI and RNAPII-pSer5 TIP STORM

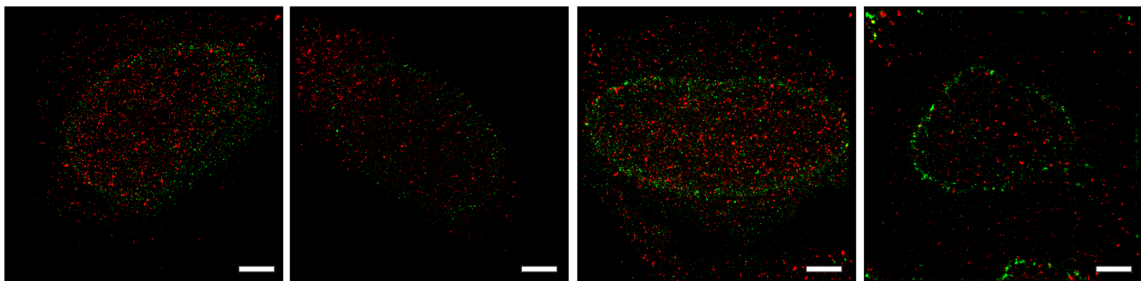

**Supplementary Fig. 7 Representative images of myosin VI and RNAPII under TIP treatment.** (A) Example immunofluorescence image of Myosin VI and RNAPII-pSer5 following TIP-treatment (scale bar 5  $\mu\text{m}$ ). Z-stack is shown in Supplementary Movie 6. (B) Further example images of myosin VI (red) and RNAPII-pSer5 (green) in HeLa cells when treated with TIP. Images were acquired at the mid-point of the nucleus (scale bar 10  $\mu\text{m}$ ). (C) Further example STORM renders of myosin VI and RNAPII-pSer5 (scale bar 2  $\mu\text{m}$ ).

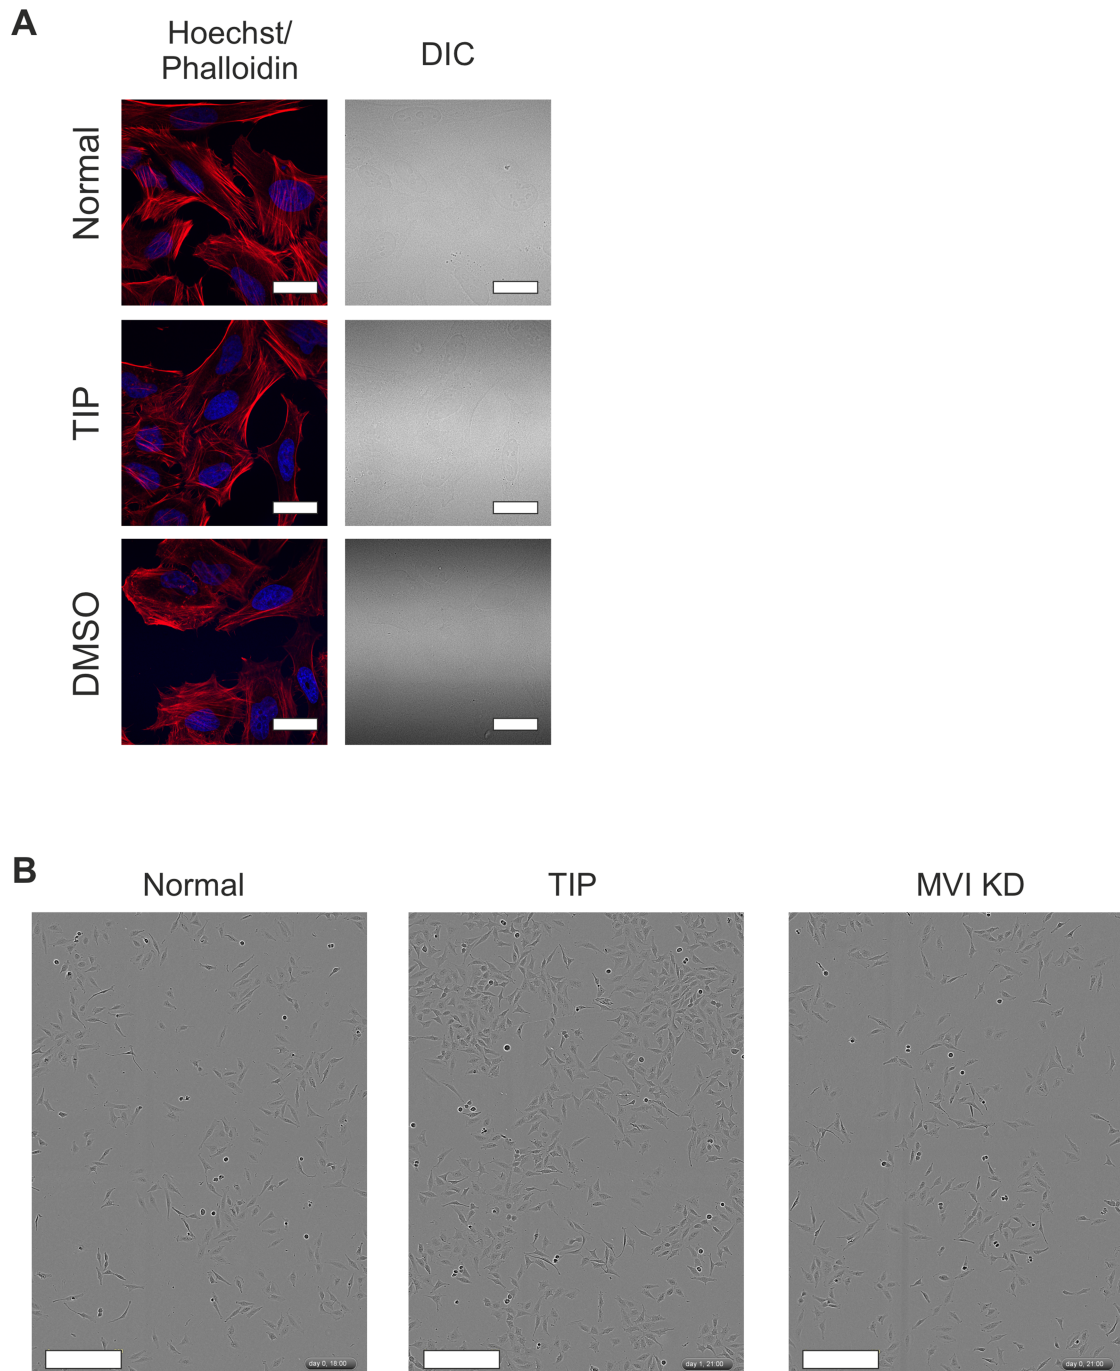

**Supplementary Fig. 8 Impact of MVI perturbation on the cytoskeleton and cell shape.** (A) Staining of HeLa cells with Hoechst and Rhodamine phalloidin to stain nuclei and actin cytoskeleton. Experiments were performed under normal, TIP-treated and carrier control conditions. The corresponding DIC image is also shown (scale bar 10  $\mu\text{m}$ ). (B) High content transmission images of live HeLa cells growing under normal, TIP treated and MVI knockdown conditions (scale bar 300  $\mu\text{m}$ ).

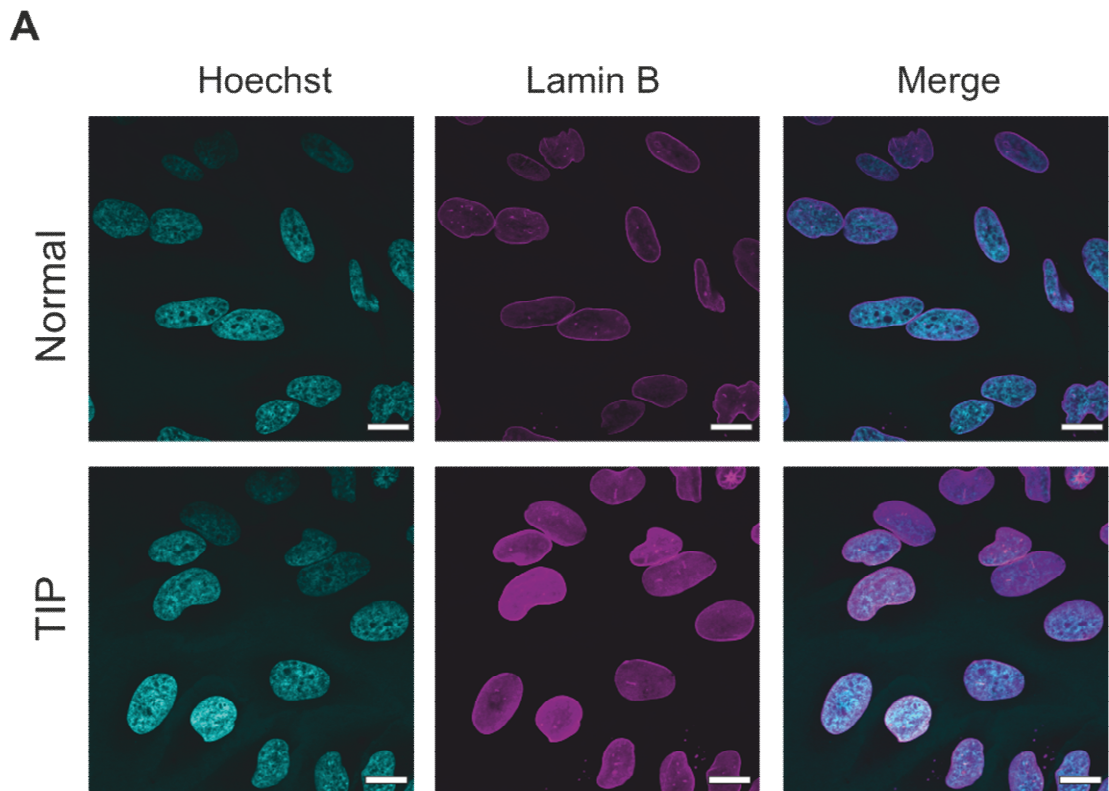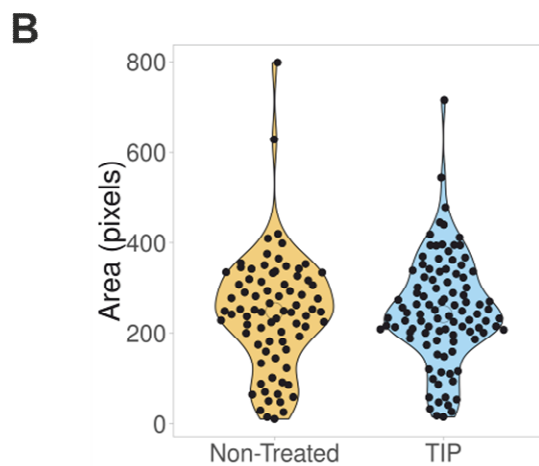

**Supplementary Fig. 9 Impact of TIP treatment on nuclear integrity and size.** (A) Representative images of lamin B immunofluorescence staining following under normal growth and TIP treatment conditions (Scale bar 15  $\mu\text{m}$ ). (B) Quantification of nuclear area under conditions used in (A).

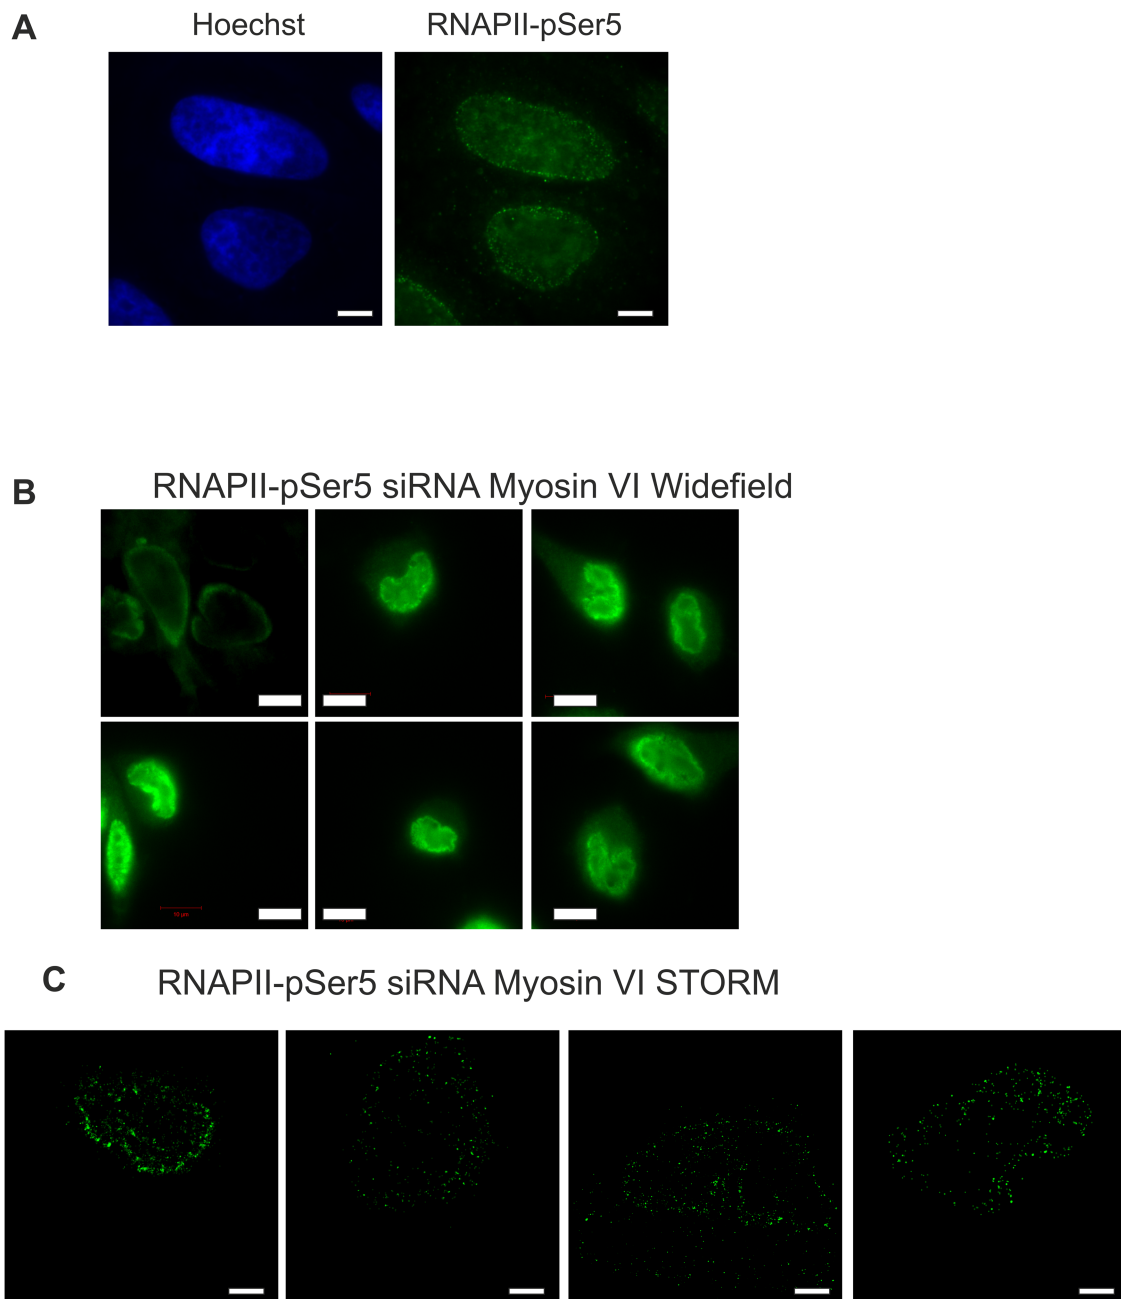

**Supplementary Fig. 10 Representative images of RNAPII following Myosin VI siRNA knockdown.** (A) Example image of RNAPII-pSer5 following immunofluorescence staining after myosin VI siRNA knockdown (scale bar 5  $\mu\text{m}$ ). Z-stack is shown in Supplementary Movie 7. (B) Further example images of RNAPII-pSer5 in HeLa cells following myosin VI knockdown. Images were acquired at the mid-point of the nucleus (scale bar 10  $\mu\text{m}$ ). (C) Further example STORM renders of RNAPII-pSer5 (scale bar 2  $\mu\text{m}$ ). Please see Supplementary Fig. 2 for myosin VI controls.

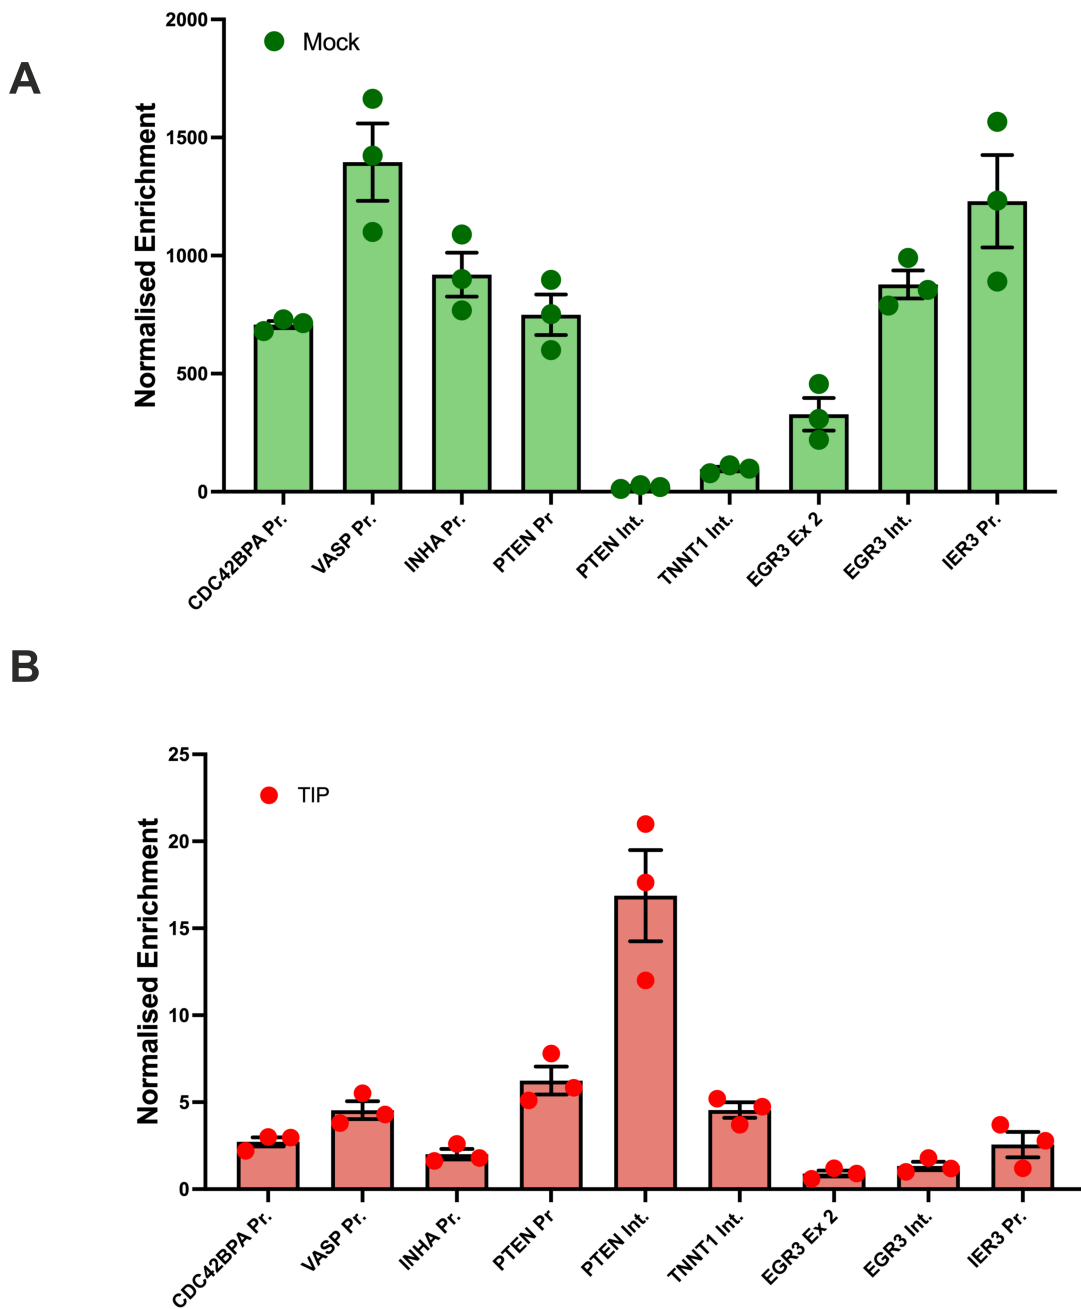

**Supplementary Fig. 11 RNAPII-pSer5 chromatin immunoprecipitation.** (A) RNAPII-pSer5 ChIP against labelled loci under normal and TIP-treated conditions. Values are the average of three independent experiments. Error bars represent SEM from three independent experiments. (B) RNAPII-pSer5 ChIP against labelled loci following TIP-treatment. Values are the average of three independent experiments. Error bars represent SEM from three independent experiments.

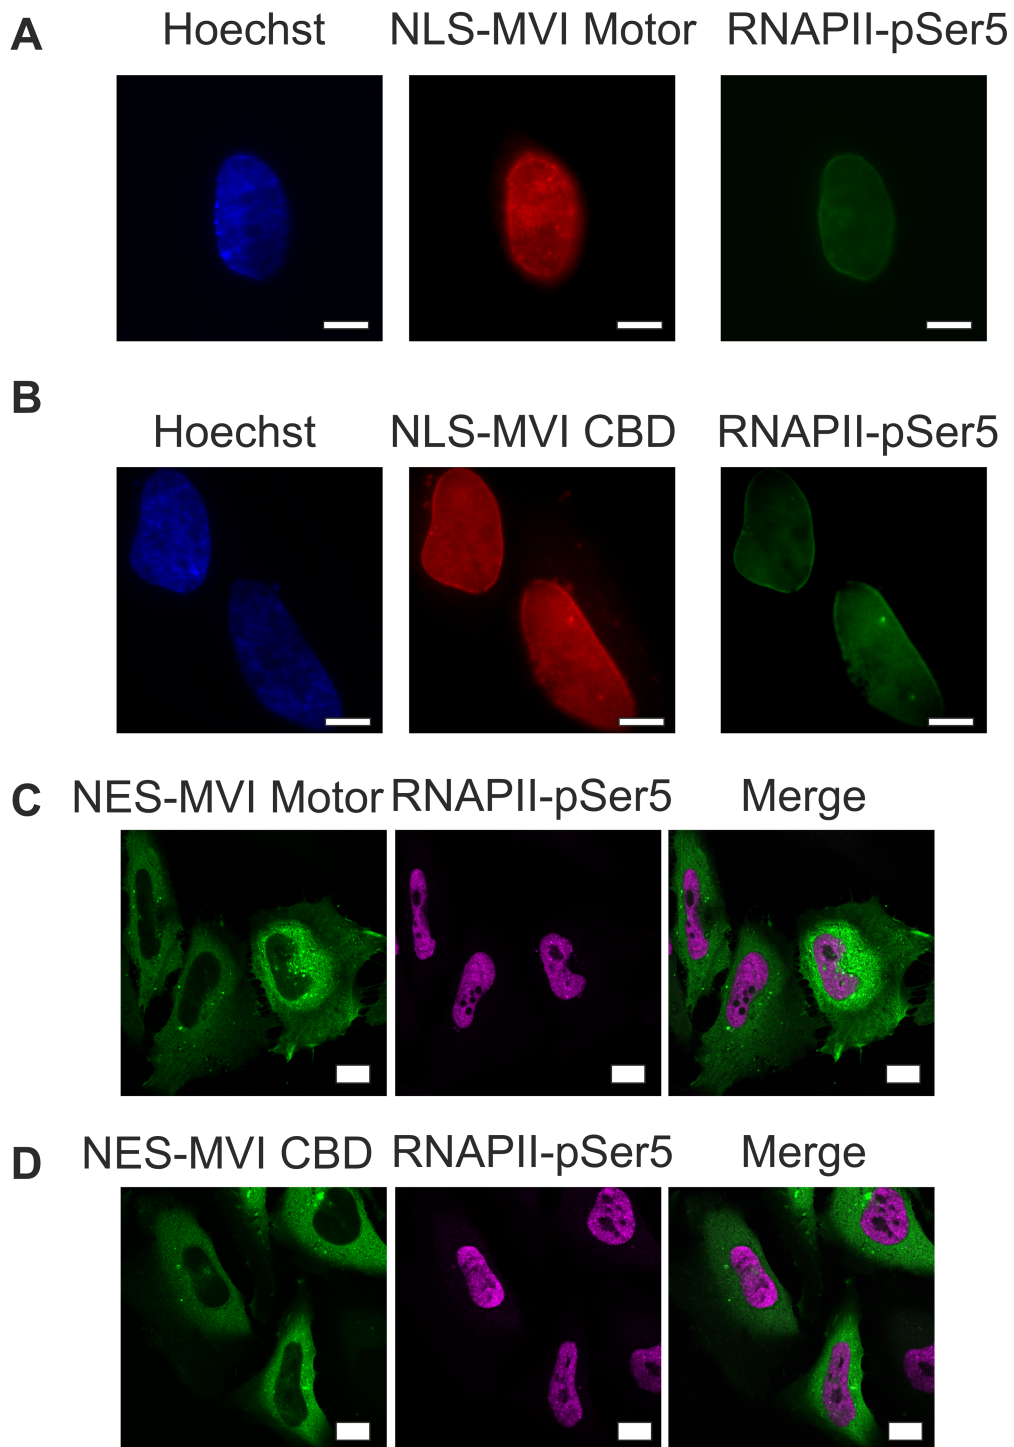

**Supplementary Fig. 12 Representative images of NLS myosin VI motor and CBD with RNAPII.** (A) Widefield Halo-TMR and Immunofluorescence staining against NLS myosin VI motor (red) and RNAPII-pSer5 (green) in HeLa cells. Images were acquired at the mid-point of the nucleus (scale bar 5  $\mu$ m). Z-stack is shown in Supplementary Movie 8. (B) Widefield Halo-TMR and Immunofluorescence staining against NLS myosin VI CBD (red) and RNAPII-pSer5 (green) in HeLa cells. Z-stack is shown in Supplementary Movie 9. (C) Confocal imaging of NES-GFP-MVI-Motor (green) and immunofluorescence staining against RNAPII-pSER5 (red). (D) Confocal imaging of NES-GFP-MVI-CBD (green) and immunofluorescence staining against RNAPII-pSER5 (red). Images were acquired at the mid-point of the nucleus (scale bar 5  $\mu$ m).

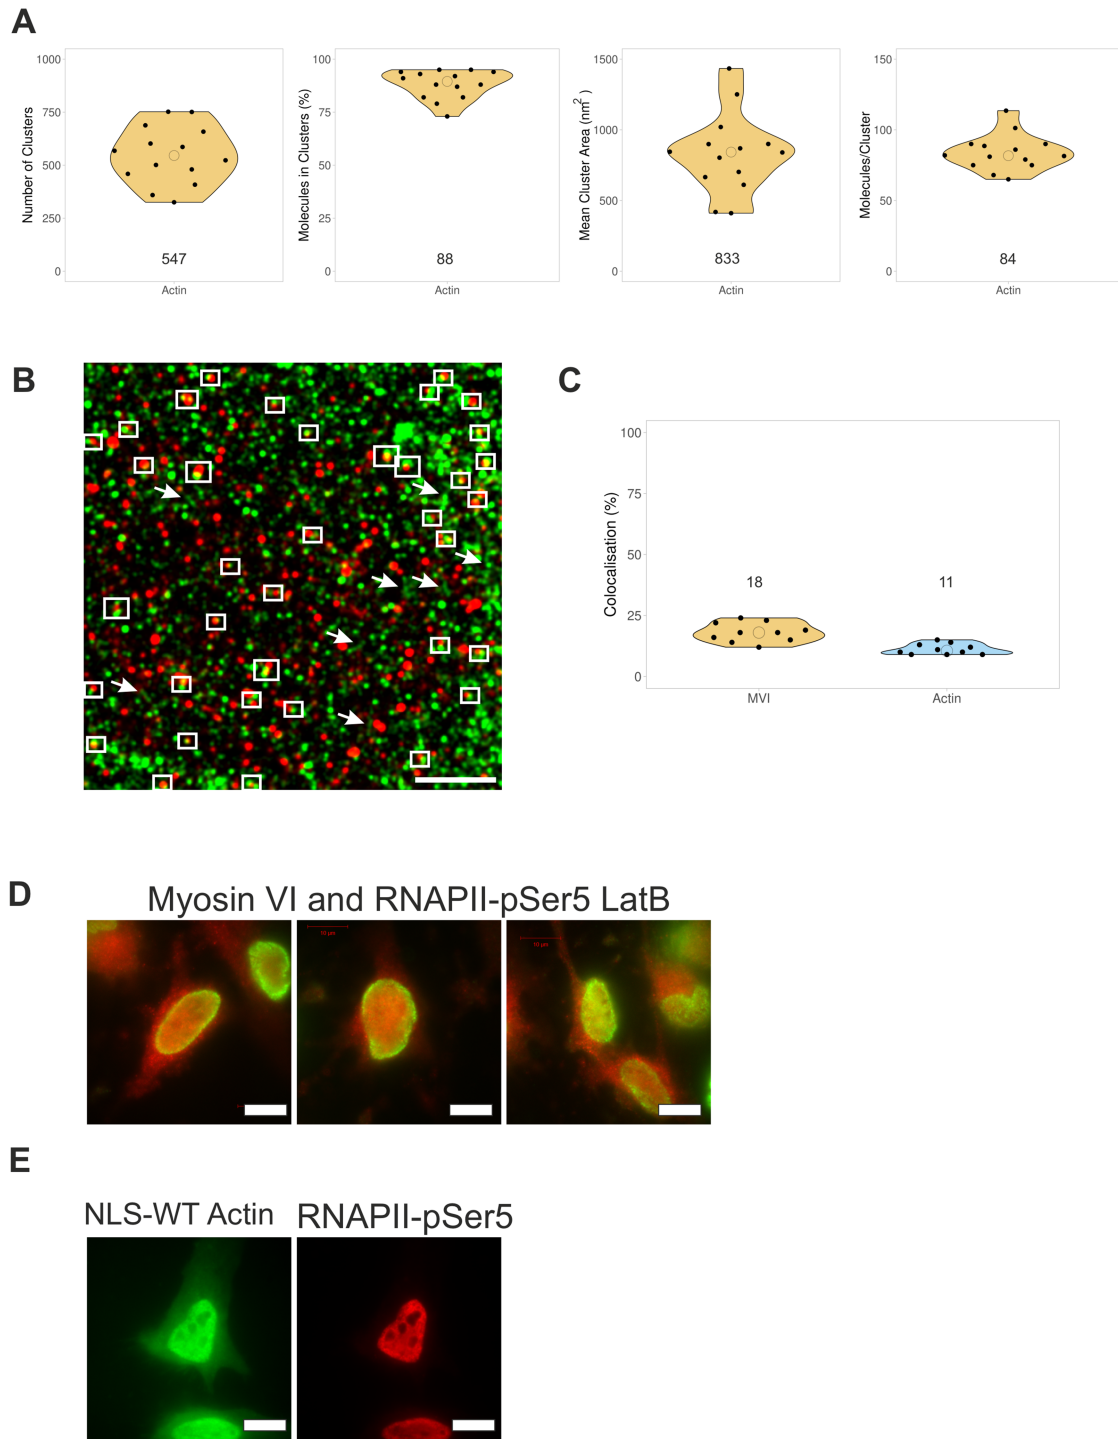

**Supplementary Fig. 13 Perturbation of nuclear actin.** (A) Cluster analysis of actin nuclear organisation. Individual data points correspond to the average value for a cell ROI ( $n=14$ ). The values represent the mean from the ROIs for each condition. (B) Example STORM render of MVI (red) and actin (green) following immunofluorescence staining. Both proteins form clusters and those in close proximity are marked by a box. Arrows indicated short filamentous structures (scale bar  $1 \mu\text{m}$ ). (C) Colocalization analysis of myosin VI (MVI) and actin clusters ( $n=10$ ). Individual data points represent the percentage of each protein which is colocalized based on a DoC value above 0.4. (D) Widefield Immunofluorescence staining against myosin VI (red) and RNAPII-pSer5 (green) in HeLa cells when treated with LatB. Images were acquired at the mid-point of the nucleus (scale bar  $10 \mu\text{m}$ ). (E) Example widefield image of WT YFP-NLS actin and immunofluorescence staining against RNAPII-pSer5 (scale bar  $10 \mu\text{m}$ ).

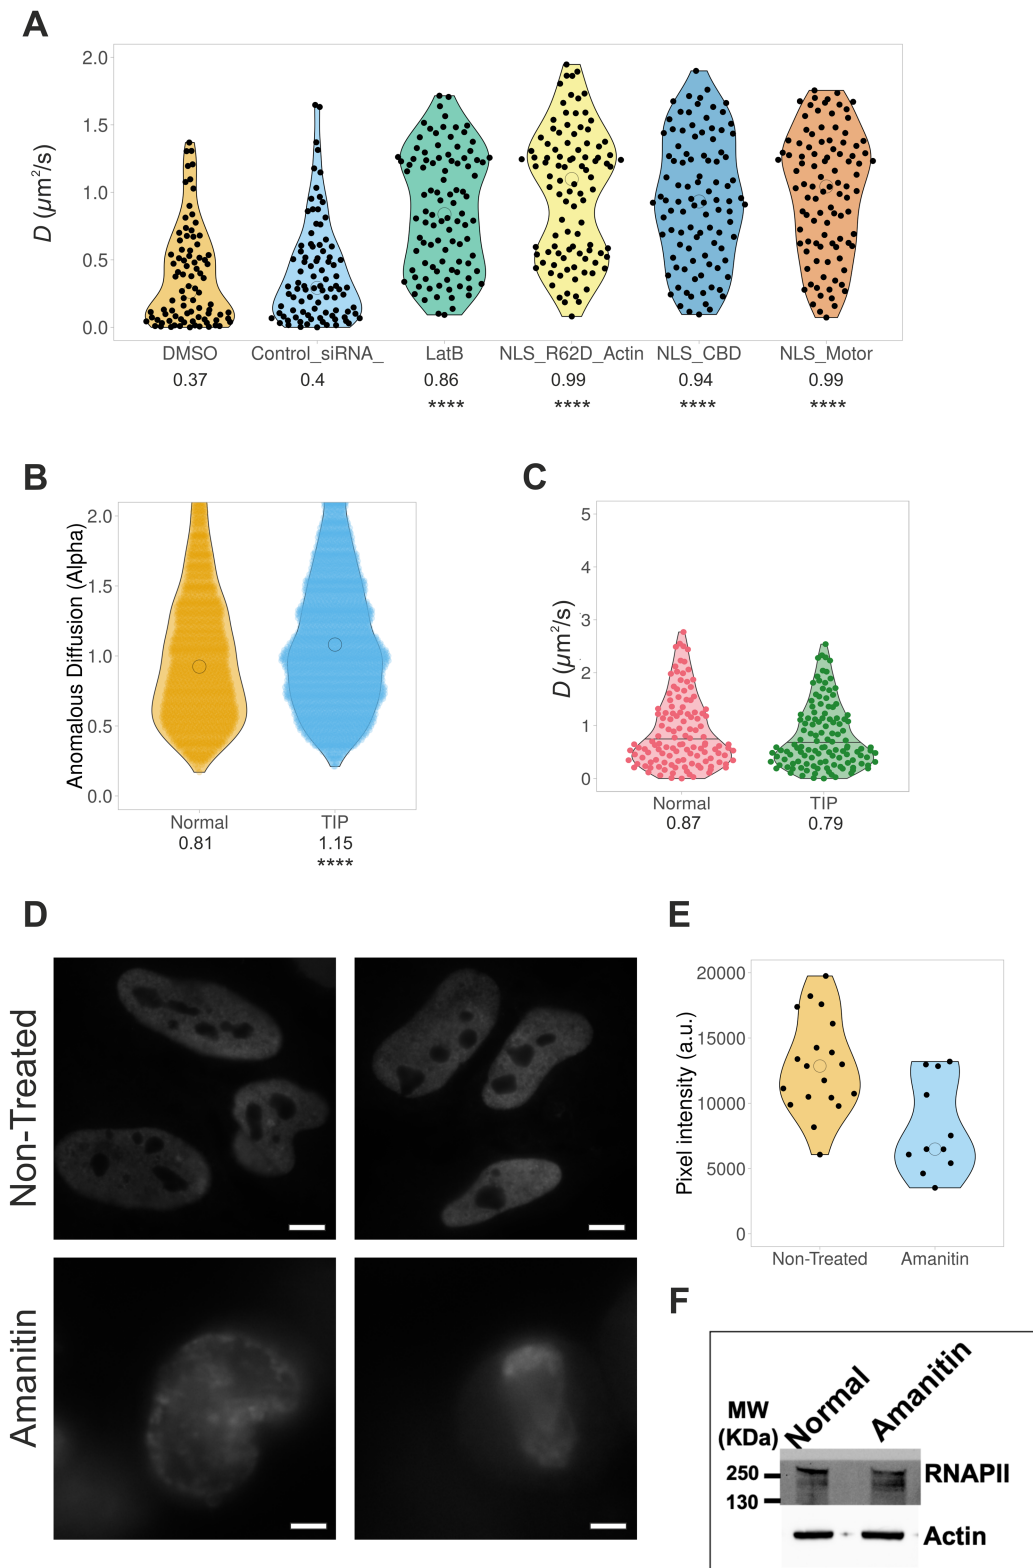

**Supplementary Fig. 14 Controls for Live cell single molecule tracking.** (A) Plot of Halo-RNAPII diffusion constants under the stated conditions derived from fitting trajectories to an anomalous diffusion model, as described in methods. Individual data points correspond to the average value for a cell ROI ( $n = 100$ ). The values represent the mean from the ROIs for each condition (Only statistically significant changes are highlighted \*\*\*\* $p < 0.0001$  by two-tailed t-test compared to normal conditions). NLS-R62D Actin, NLS CBD and NLS Motor refer to tracking of RNAPII following transfection of these constructs. NLS CBD and NLS motor were transfected in to Halo-RNAPII cells. (B) Plot of Halo-RNAPII anomalous diffusion alpha value



under normal and TIP treated conditions. Values were derived from fitting trajectories to an anomalous diffusion model, as described in methods. Data points correspond to the individual tracks across all cells ( $n = 100$ ). The values represent the mean from the ROIs for each condition. (\*\*\*\* $p < 0.0001$  by two-tailed t-test compared to normal conditions). (C) Plot of SNAP-tag diffusion constants under the stated conditions derived from fitting trajectories to an anomalous diffusion model, as described in methods. Data points correspond to the average value for a cell ROI ( $n=100$ ). The values represent the mean from the ROIs for each condition. There is not a statistically significant change between the datasets. (D) Example immunofluorescence staining against RNAPII-pSer5 under non-treated and amanitin treated conditions (scale bar 5  $\mu\text{m}$ ). (E) Quantification of mean nuclear pixel intensity for immunofluorescence staining against RNAPII-pSer5. (F) Corresponding western-blot against RNAPII-pSer5 under non-treated (Normal) and amanitin treated conditions.

**A**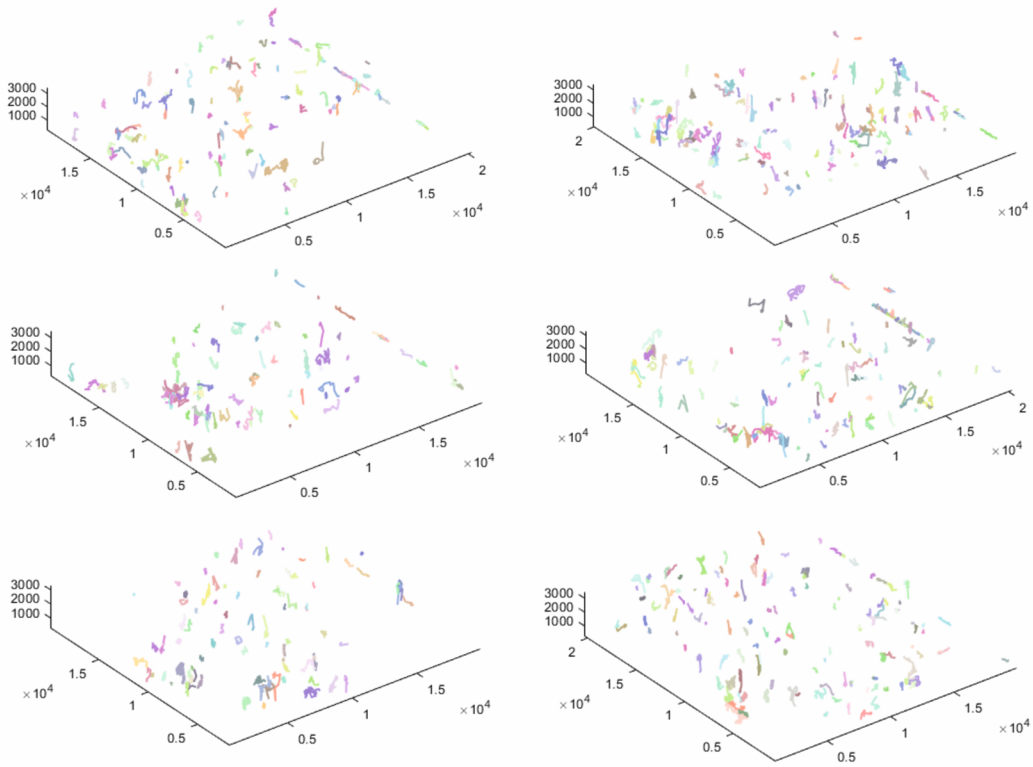**B**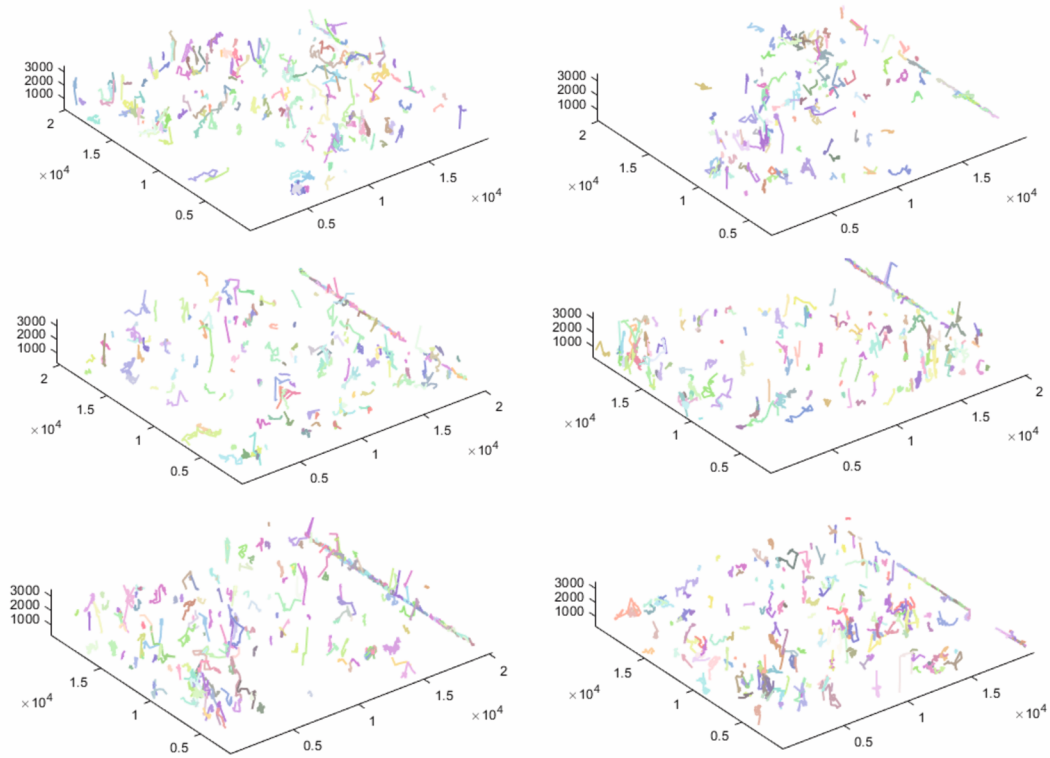

**Supplementary Fig. 15 3D single molecule tracking examples.** 3D single molecule trajectories under (A) normal and (B) TIP-treated conditions.

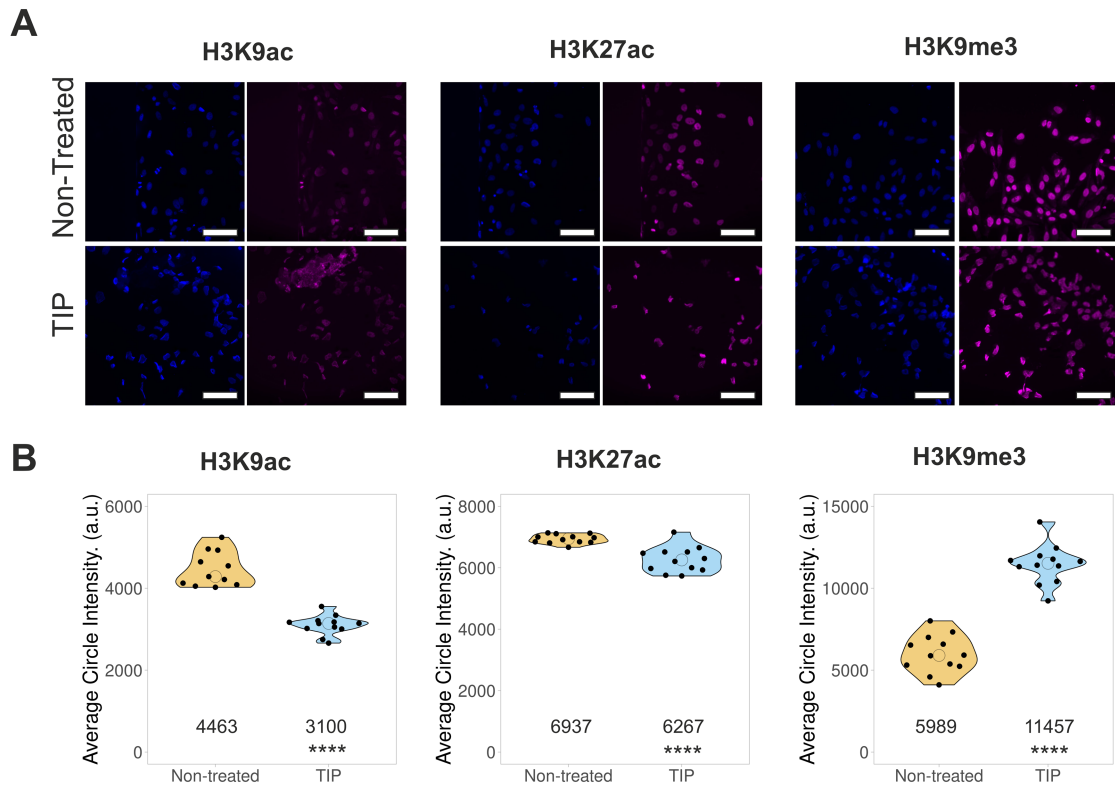

**Supplementary Fig. 16 High-content screening of histone marks.** (A) Example immunofluorescence staining against stated histones (magenta) and DNA (blue) in HeLa cells under normal and TIP-treated conditions (scale bar 10  $\mu\text{m}$ ). (B) The fluorescence intensity within the nucleus was measured for each histone marker under untreated and TIP-treated conditions, and each data point represents the average from a minimum of 1000 nuclei (Only statistically significant changes are highlighted \*\*\*\* $p < 0.0001$  by two-tailed t-test compared to untreated conditions).

**A**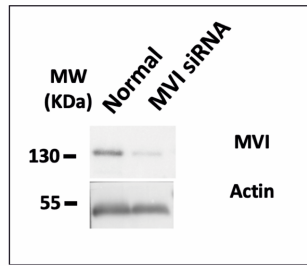**B**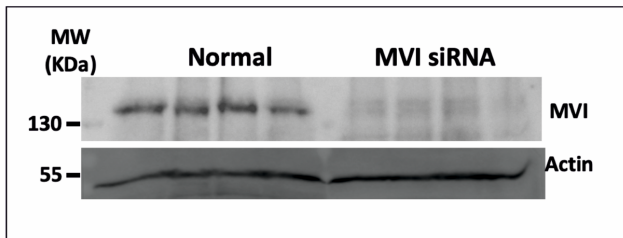

**Supplementary Fig. 17 Western-blot corresponding to sample used in Figure 6 and 7.** (A). Western-blot against MVI under normal and MVI-knockdown (MVI siRNA) conditions used in (Figure 6C) shows a 97% reduction in MVI. (B) Western-blot against MVI under normal and MVI-knockdown conditions. Samples were used for the RNA-seq analysis and serum-stimulation experiments in Figure 7.

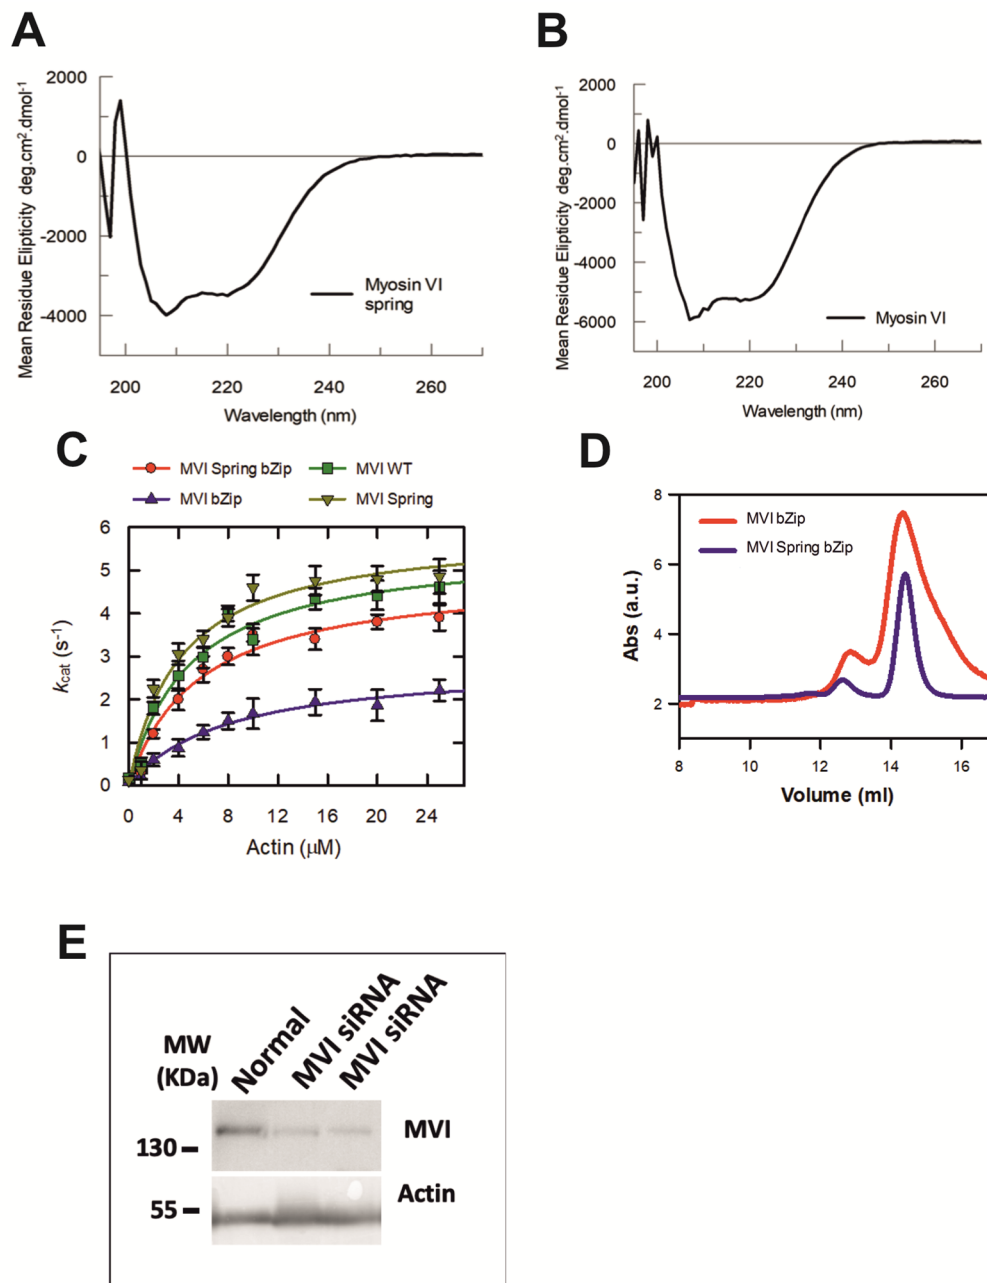

**Supplementary Fig. 18 Characterisation of myosin VI spring construct.** (A) Representative CD spectra for recombinant full-length myosin VI spring. (B) Representative CD spectra for recombinant full-length wild type myosin VI. (C) Michaelis-Menten plot of displaying steady-state actin-activated ATPase activity for the myosin VI (MVI) constructs. Error bars represent SEM from three-independent experiments. (D) Representative size exclusion chromatography trace for 1 mg/ml myosin VI bZip and myosin VI spring bZip constructs. (E) Western-blot against MVI under normal and MVI knockdown conditions before transfection with Halo-MVI(WT) and Halo-MVI Spring.

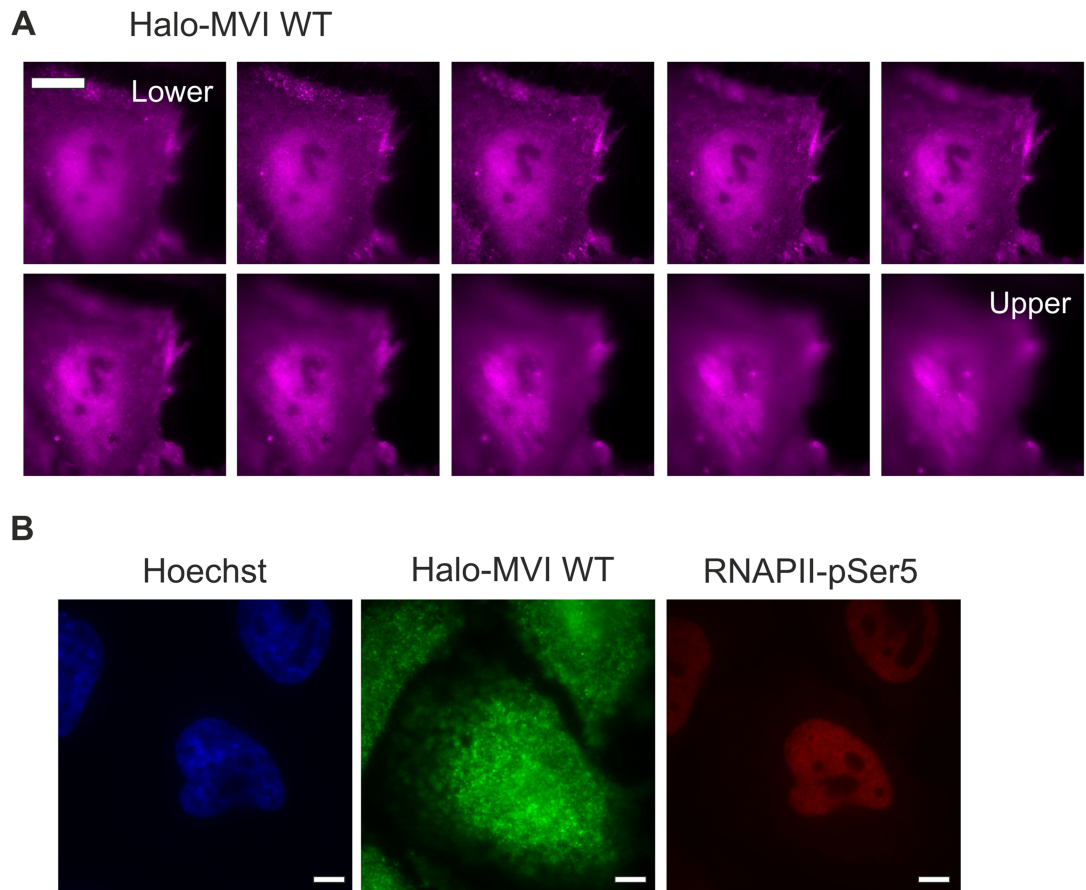

**Supplementary Fig. 19 Nuclear localisation of Halo-MVI WT construct.** (A) Halo-TMR staining against Halo-MVI in HeLa cells Images where acquired at 400 nm intervals in the z axis. (scale bar 10  $\mu\text{m}$ ). (B) Halo-TMR staining against Halo-MVI WT, DNA is shown in blue and immunofluorescence staining against RNAPII-pSer5 in HeLa cells (scale bar 5  $\mu\text{m}$ ). Z-stack is shown in Supplementary Movie 10.

**A** Halo-MVI Spring

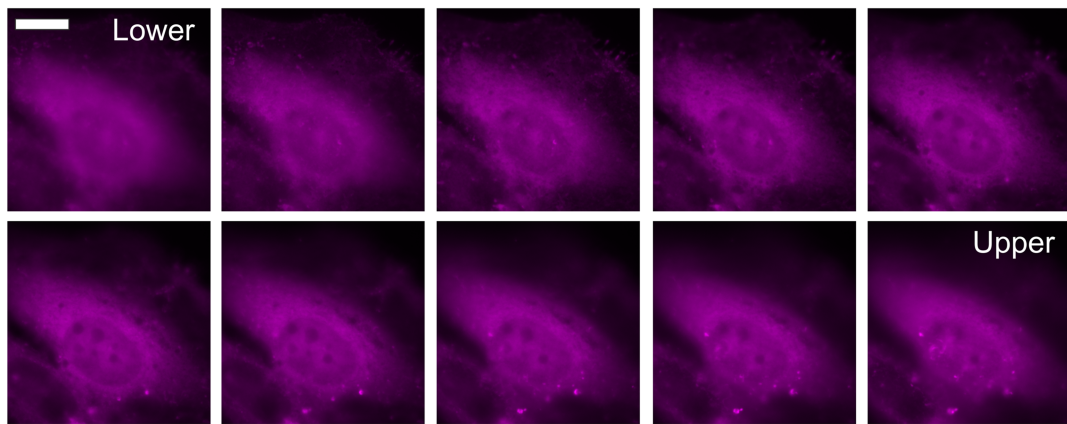

**B**

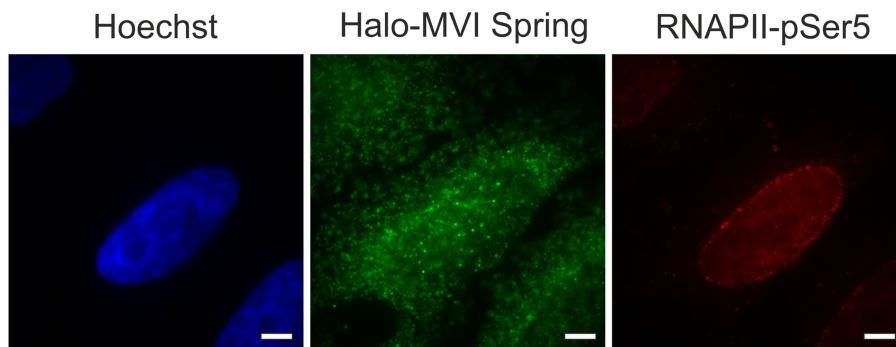

**Supplementary Fig. 20 Nuclear localisation of Halo-MVI Spring construct.** (A) Halo-TMR staining against Halo-MVI Spring in HeLa cells Images where acquired at 400 nm intervals in the z axis. (scale bar 10  $\mu\text{m}$ ). (B) Halo-TMR staining against Halo-MVI Spring, DNA is shown in blue and immunofluorescence staining against RNAPII-pSer5 in HeLa cells (scale bar 5  $\mu\text{m}$ ). Z-stack is shown in Supplementary Movie 11.

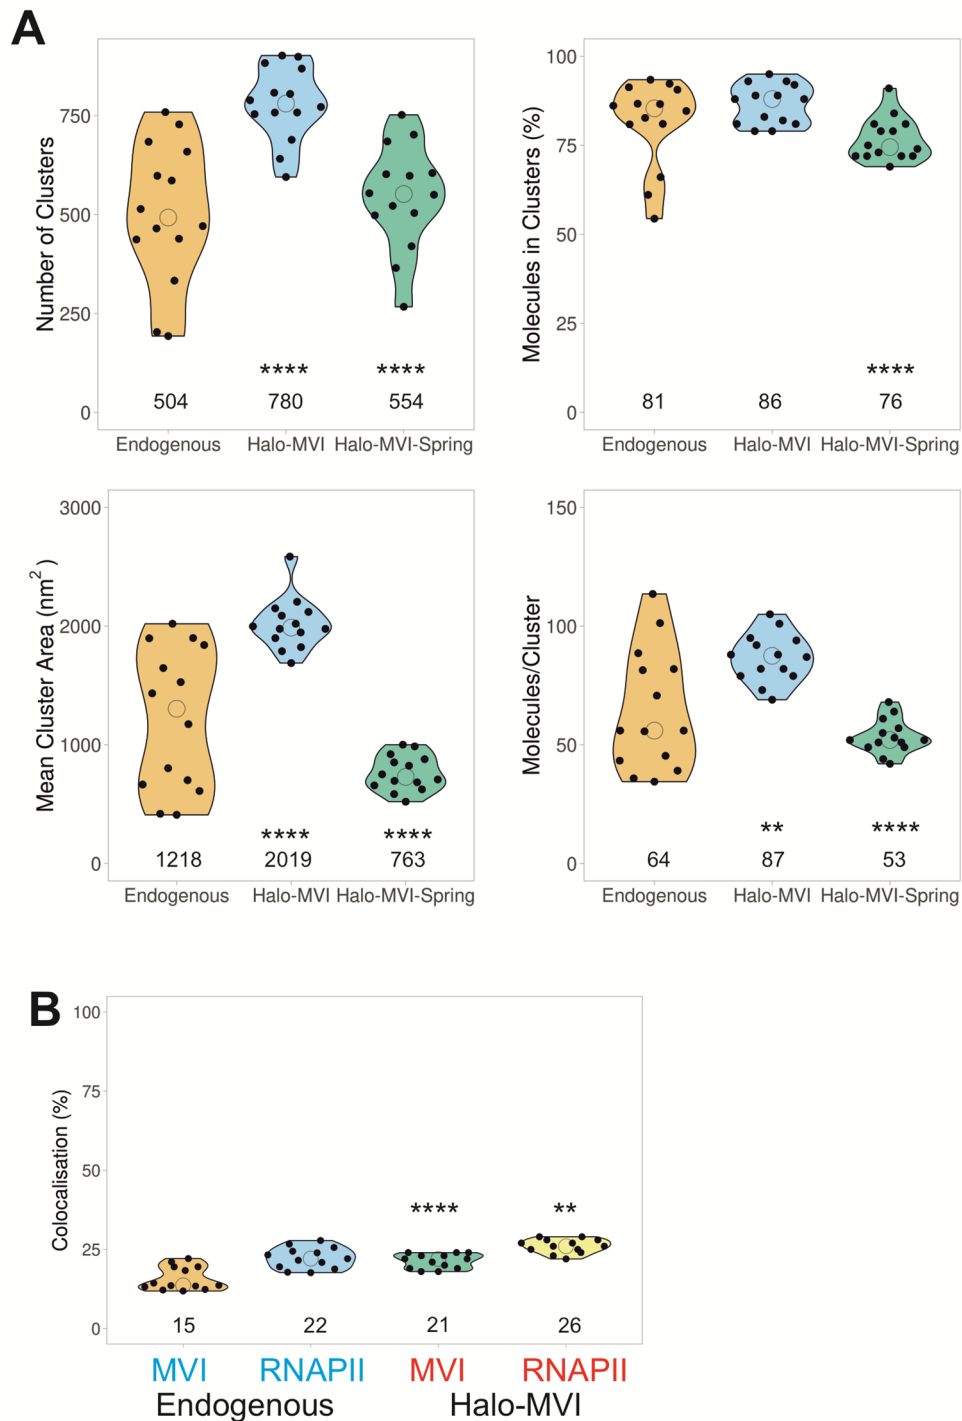

**Supplementary Fig. 21 Nuclear localisation of Halo MVI constructs.** (A) Cluster analysis of MVI nuclear organisation comparing endogenous protein (n=13), Over expression of Halo-WT-MVI (n=13) and Over expression of Halo-MVI-Spring (n=13). The values represent the mean from the ROIs for each condition (Only statistically significant changes are highlighted \*\*p < 0.01, \*\*\*\*p < 0.0001 by two-tailed t-test). Halo-MVI was compared to endogenous and Halo-MVI-Spring was compared to Halo-MVI. (B) Colocalization analysis of myosin VI (MVI) and RNAPII-pSer5 clusters with endogenous protein (n=13) and over expression of Halo-WT-MVI (n=13). Individual data points represent the percentage of each protein which is colocalized based on a DoC value above 0.4. (Only statistically significant changes are highlighted \*\*\*\*p < 0.0001 by two-tailed t-test compared to endogenous conditions for each protein).



## Supplementary Table 1. GO Gene Expression analysis

False Discovery Rate (FDR) corrected p values were calculated from the hypergeometric test.

| p value (FDR corrected) | Genes in List | Total Genes | Functional Category                                     | GO Term    |
|-------------------------|---------------|-------------|---------------------------------------------------------|------------|
| 2.88E-09                | 308           | 3903        | Regulation of cell communication                        | GO:0010646 |
| 2.88E-09                | 310           | 3952        | Regulation of signaling                                 | GO:0023051 |
| 7.76E-09                | 265           | 3287        | Cell surface receptor signaling pathway                 | GO:0007166 |
| 7.76E-09                | 280           | 3529        | Regulation of signal transduction                       | GO:0009966 |
| 7.20E-07                | 244           | 3113        | Intracellular signal transduction                       | GO:0035556 |
| 1.71E-06                | 269           | 3547        | Response to organic substance                           | GO:0010033 |
| 2.78E-06                | 169           | 2027        | Regulation of intracellular signal transduction         | GO:1902531 |
| 2.78E-06                | 204           | 2561        | Response to external stimulus                           | GO:0009605 |
| 2.78E-06                | 218           | 2785        | Anatomical structure morphogenesis                      | GO:0009653 |
| 2.78E-06                | 226           | 2905        | Regulation of localization                              | GO:0032879 |
| 2.78E-06                | 151           | 1756        | Regulation of cell proliferation                        | GO:0042127 |
| 2.78E-06                | 344           | 4820        | Regulation of response to stimulus                      | GO:0048583 |
| 2.78E-06                | 256           | 3382        | Regulation of multicellular organismal process          | GO:0051239 |
| 2.78E-06                | 119           | 1286        | Negative regulation of multicellular organismal process | GO:0051241 |
| 2.78E-06                | 64            | 551         | Circulatory system process                              | GO:0003013 |
| 3.08E-06                | 63            | 542         | Blood circulation                                       | GO:0008015 |
| 3.85E-06                | 161           | 1921        | Locomotion                                              | GO:0040011 |
| 3.90E-06                | 197           | 2474        | Nervous system development                              | GO:0007399 |
| 4.67E-06                | 99            | 1028        | Regulation of cellular component movement               | GO:0051270 |
| 9.19E-06                | 175           | 2165        | Cell proliferation                                      | GO:0008283 |

**Supplementary Table 2. Recombinant DNA.**

| <b>Construct</b>                     | <b>Source</b>                |
|--------------------------------------|------------------------------|
| Xenopus pFastBac1 Calmodulin (1-end) | Sellers Lab                  |
| Human pFastbacHTB MVI (1-1253)       | Fili et al 2017              |
| Human pFastbacHTB MVI bzip           | Sellers Lab                  |
| Human pFastbacHTB MVI Spring         | Synthetic Gene - This Study  |
| Human pFastbacHTB MVI Spring bzip    | Synthetic Gene - This Study  |
| pHalo-Rpb1                           | Darzacq lab                  |
| pSNAP-C1                             | Addgene 58186                |
| pSNAP-Rpb1                           | This Study                   |
| YFP-NLS-R62D Actin                   | de Lanerolle Lab             |
| pLV-Tet0-Halo-NLS-Motor (1-814)      | Große-Berkenbusch et al 2020 |
| pLV-Tet0-Halo-NLS-CBD (1060-1253)    | Große-Berkenbusch et al 2020 |
| pcDNA3.1 MVI                         | Synthetic Gene - This Study  |
| pcDNA3.1 MVI Spring                  | Synthetic Gene - This Study  |
| pEGFP-NES-Motor (1-814)              | Synthetic Gene - This Study  |
| pEGFP-NES-CBD (1060-1253)            | Synthetic Gene - This Study  |

**Supplementary Table 3. Primers for qPCR.**

| Sequence                | Use                  |
|-------------------------|----------------------|
| CTGCTGCAGGAACCTCTCAT    | VASP For             |
| CTTCCTGGGGAGAATGTGG     | VASP Rev             |
| GCTACGGCAAAGTCTGCTCT    | CDC42BPA Pro. For    |
| TCACAACCACTGCAGTCTCC    | CDC42BPA Pro. Rev    |
| AGGGGAATCTCTAGGCAA      | PTEN Pro. For        |
| TGCATTGCTCTTTCTTTT      | PTEN Pro. Rev        |
| GAATGGTTTGTGGCTCAGGT    | PTEN Int. For        |
| CCCCTGGGTTGAAATATGG     | PTEN Int. Rev        |
| GGTGCCTGAGAAGAGGTGAG    | EGR3 ex2 For         |
| CCATGTGGATGAATGAGGTG    | EGR3 ex2 Rev         |
| TCACGTACCACACACACG      | EGR3 Int. For        |
| TCCGGTCTGAACTACCTG      | EGR3 Int. Rev        |
| CCCCTGCTTCTTCTCAGTTG    | IER3 Pro. For        |
| AAAAGATGCACGGATTGGAG    | IER3 Pro. Rev        |
| CTCACCTTCTCCTCCTCCT     | TNNT1 Int. For       |
| GTCCAGCAGAGACTGGAACC    | TNNT1 Int. Rev       |
| ATCAGGAGACAGAAGCCATAAAG | PTEN RT-qPCR For.    |
| GTCTGTGTCTCGGCTAATC     | PTEN RT-qPCR Rev.    |
| GCGGCAAAGTAGGAGAAGAA    | IER3 RT-qPCR For     |
| GTAGACAGACGGAGTTGAGAATG | IER3 RT-qPCR Rev     |
| GGAGAAGAACAGCACAACT     | VASP RT-qPCR For     |
| CCCTCTGTAGGTCCGAGTAAT   | VASP RT-qPCR Rev     |
| TGGTCAAGGCAGAACAGAAG    | TNNT1 RT-qPCR For    |
| CCCATGTAGTCAATGTCCAGAG  | TNNT1 RT-qPCR Rev    |
| CTCGGATGGAGGTTACTCTTTC  | INHA RT-qPCR For     |
| CACCAGCCATGGGATTAAGA    | INHA RT-qPCR Rev     |
| TCAGCCCAGTGTTGTCATTAG   | CDC42BPA RT-qPCR For |
| TCTTTCCGACTTGCATGGATAA  | CDC42BPA RT-qPCR Rev |
| GGTCCTTTGAAGTGGAGTAATA  | EGR3 RT-qPCR For     |
| CACAGGAGAAGTAACGCTAACA  | EGR3 RT-qPCR Rev     |
| GTCTCCTCTGACTTCAACAGCG  | GAPDH RT-qPCR For    |
| ACCACCTGTTGCTGTAGCCAA   | GAPDH RT-qPCR Rev    |
